# Supplementary material for: The electric field modulation of electronic properties in a type-II phosphorene/PbI2 van der Waals heterojunction
Source: Royal Society of Chemistry journal article supplement (doi:10.1039/c9cp00733d), 2019-01-01
Supplement: c9cp00733d1.pdf [file c9cp00733d1.pdf]

## Electric field modulation of electronic properties in type-II phosphorene/PbI<sub>2</sub> van der Waals heterojunction

Yuting Wei<sup>1,2</sup>, Fei Wang<sup>1,\*</sup>, Wenli Zhang<sup>1</sup>, Xiuwen Zhang<sup>2,\*</sup>

Supporting information:

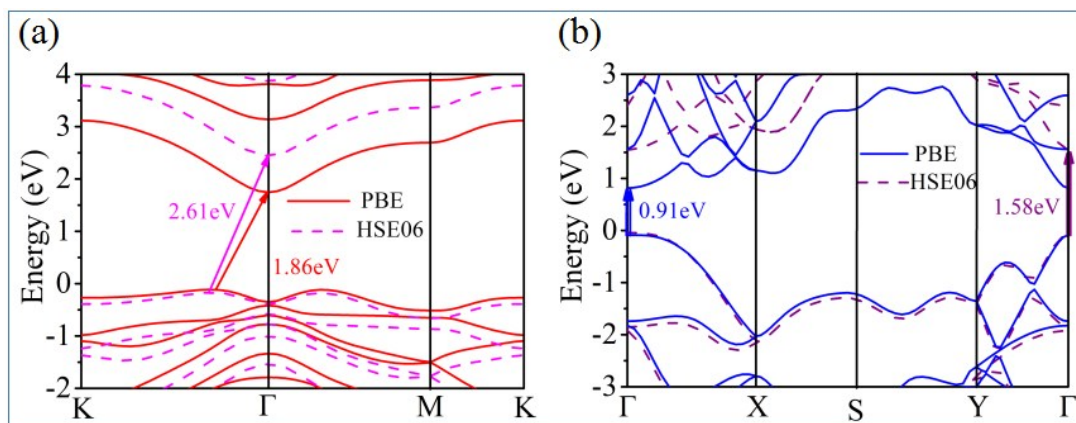

Fig. S1 The band structures of PbI<sub>2</sub> (a) and phosphorene (b) monolayer. The solid and dash line are the band structure calculated by the PBE and HSE06.

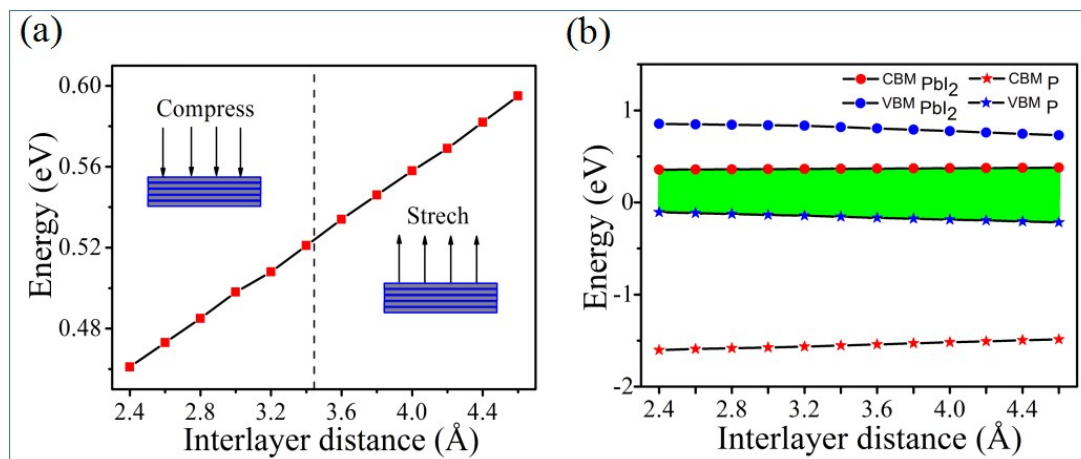

Fig. S2 Variation of band gap (a) and band edge (b) of the P/PbI<sub>2</sub> vdW heterojunction under different interlayer distance.
